# Supplementary material for: Efficient CO2 electroreduction to formate using Bi–Pb bimetallic catalysts with 2D vertical nanosheets
Source: Royal Society of Chemistry journal article supplement (doi:10.1039/d4ta02202e), 2024-01-01
Supplement: d4ta02202e1.pdf [file d4ta02202e1.pdf]

## Supporting information

### **Efficient CO<sub>2</sub> electroreduction to formate by Bi-Pb bimetallic catalysts with 2D vertically nanosheets**

Chongyang Jiang,<sup>a</sup> Shaojuan Zeng,<sup>\*a</sup> Jiaqi Feng,<sup>b</sup> Guilin Li,<sup>a</sup> Bin Hai,<sup>c</sup> Kuilin Peng,<sup>a</sup>

Xiangping Zhang<sup>\*a</sup>

<sup>a</sup> *Beijing Key Laboratory of Ionic Liquids Clean Process, State Key Laboratory of Multiphase Complex Systems, CAS Key Laboratory of Green Process and Engineering, Institute of Process Engineering, Chinese Academy of Sciences, Beijing, 100190, China*

<sup>b</sup> *Beijing National Laboratory for Molecular Sciences, Key Laboratory of Colloid and Interface and Thermodynamics, Institute of Chemistry, Chinese Academy of Sciences, Beijing, 100190, China*

<sup>c</sup> *College of Chemistry and Chemical Engineering, Henan University, Kaifeng, 475000, China*

\*E-mail address: [sjzeng@ipe.ac.cn](mailto:sjzeng@ipe.ac.cn) (S. Zeng); [xpzhang@ipe.ac.cn](mailto:xpzhang@ipe.ac.cn) (X. Zhang)

## Supplementary Notes

### Experimental section

Carbon paper (CP, 99.8%) with 1.5 mm thickness was purchased from Shanghai Hesun Co., Ltd. Hydrochloric acid (HCl, 36.5%) and sulfuric acid (H<sub>2</sub>SO<sub>4</sub>, 98%) were obtained from Beijing Chemical Works. Lead acetate (Pb(CH<sub>3</sub>COO)<sub>2</sub>, 99.8%), sodium fluoride (NaF, 99.8%), potassium bicarbonate (KHCO<sub>3</sub>, 99.8%), acetonitrile (AcN, 99.8%), bismuth nitrate (Bi(NO<sub>3</sub>)<sub>3</sub>, 99.8%) and acetone (CH<sub>3</sub>COCH<sub>3</sub>) were purchased from Shanghai Macklin Biochemical Co., Ltd. The 1-butyl-3-methylimidazolium tetrafluoroborate ionic liquid ([Bmim][BF<sub>4</sub>], 98%) was purchased from Shanghai Chengjie Co., Ltd.

### Characterizations

Scanning electron microscope (SEM, Hitachi SU8020) and Transmission electron microscope (TEM, JEOL JEM-2100 system) were employed to observe the morphologies of the catalysts. X-ray diffraction (XRD, Rigaku Smartlab diffractometer) and X-ray photoelectron spectroscopy (XPS, Thermo Fisher Scientific ESCALAB 250Xi) were used to confirm the crystal structures and elemental compositions, respectively. Inductively coupled plasma spectrometry (ICP) was carried on an ICPE-9000 to determine the metal content.

### Product analysis

The main products of CO<sub>2</sub> electroreduction are formate, CO, and H<sub>2</sub>, respectively. Gas products were quantified by gas chromatography (GC, Agilent 7890A GC) with a thermal conductivity detector (TCD) and a flame ionization detector (FID). N<sub>2</sub> was

used as the carrier gas. The gases from the outlet of the cathodic compartment were collected by a gas bag, and then injected into the GC. Every gas sample was measured three times.

The concentration of liquid products was detected using a 600 MHz  $^1\text{H}$  liquid NMR spectrometer (Bruker Advance). Phenol was used as an internal reference for the liquid products. The standard solution consisted of  $0.5 \times 10^{-3}$  M phenol and DMSO. Typically, NMR samples were prepared by mixing 300  $\mu\text{L}$  of the product-containing electrolyte and 200  $\mu\text{L}$  standard solution. Two electrons are needed to produce one  $\text{CO}$ ,  $\text{H}_2$  and formate molecule, so the FE of the  $\text{CO}_2$  electroreduction products can be calculated as follows (Equation (1)):

$$\text{FE} = 2Fn/Q \quad (1)$$

Where  $F$  is the Faraday constant,  $96485 \text{ C mol}^{-1}$ ;  $n$  is the molar amount of product, mol; and  $Q$  is the charge recorded by electrochemical workstation, C.

The formula for calculating the production rate of formate was as follow (Equation (2)).

$$\textit{The production of formate} = \frac{n_{\text{formate}}}{t \times S} \quad (2)$$

Where  $n_{\text{formate}}$  is the molar amount of formate (mol), quantified by NMR;  $t$  is the electroreduction reaction time (h);  $S$  is the geometric area of the catalyst.

## **DFT calculations**

In order to investigate the origin of the high performance of Bi-Pb bimetallic catalysts, theoretical calculations were carried out using periodic DFT implemented in the Vienna Ab initio Simulation Package (VASP 5.4.4). The projector-augmented

method was applied to solve the ion-electron interaction in a periodic system. The generalized gradient approximation with Perdew-Burke-Ernzerh of functionals was used to treat the exchange-correlation interactions in the Kohn-Sham equations. Spin-polarized calculations were carried out with an energy cutoff for the plane waves of 520 eV. The convergence criteria for optimization of the atomic structure were set at  $1 \times 10^{-5}$  eV and a Hellmann-Feynman force of 0.02 eV  $\text{\AA}^{-1}$ . A Monkforst-Pack  $k$ -point mesh of  $5 \times 5 \times 1$   $k$ -points was employed. The Pb(111) surface with four atomic layers and  $5 \times 5$  unit cells was used as the model system. In order to simulate the role of Bi on this bimetallic catalyst, a Bi-Pb(111) surface was built by decorating Bi atom onto the surface of pure Pb(111) surface. A vacuum layer of 15  $\text{\AA}$  was added to separate neighbouring slabs to avoid possible interaction.

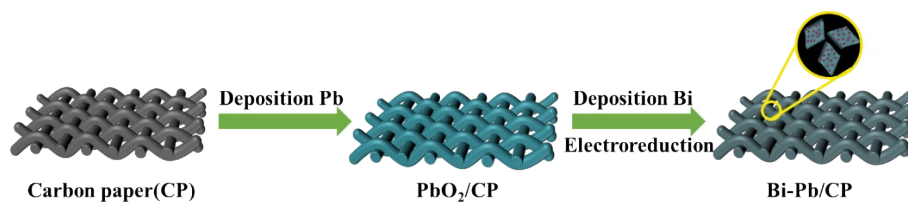

Fig. S1. The schematic of the synthesis process for the Bi-Pb bimetallic catalyst

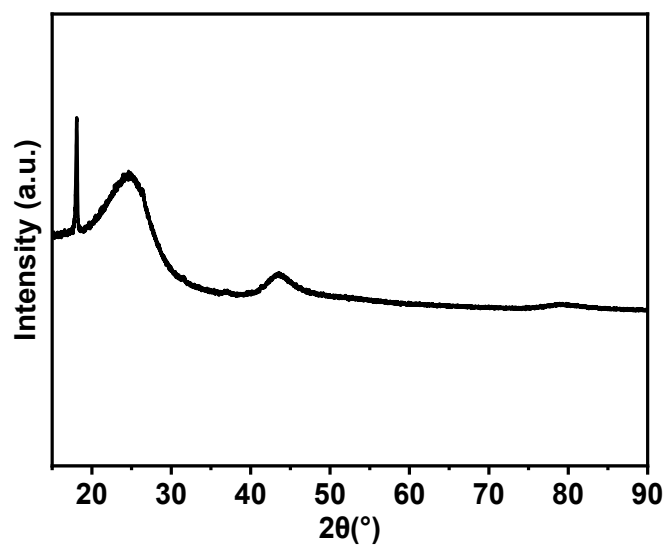

Fig. S2. XRD pattern of pure carbon paper

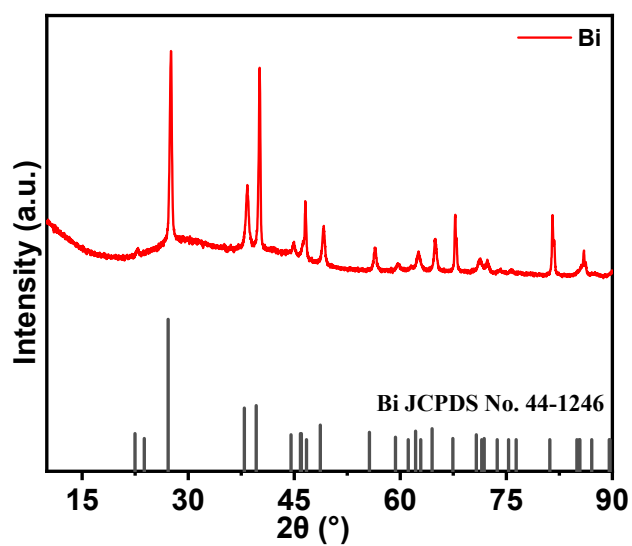

Fig. S3. XRD pattern of Bi/CP electrode

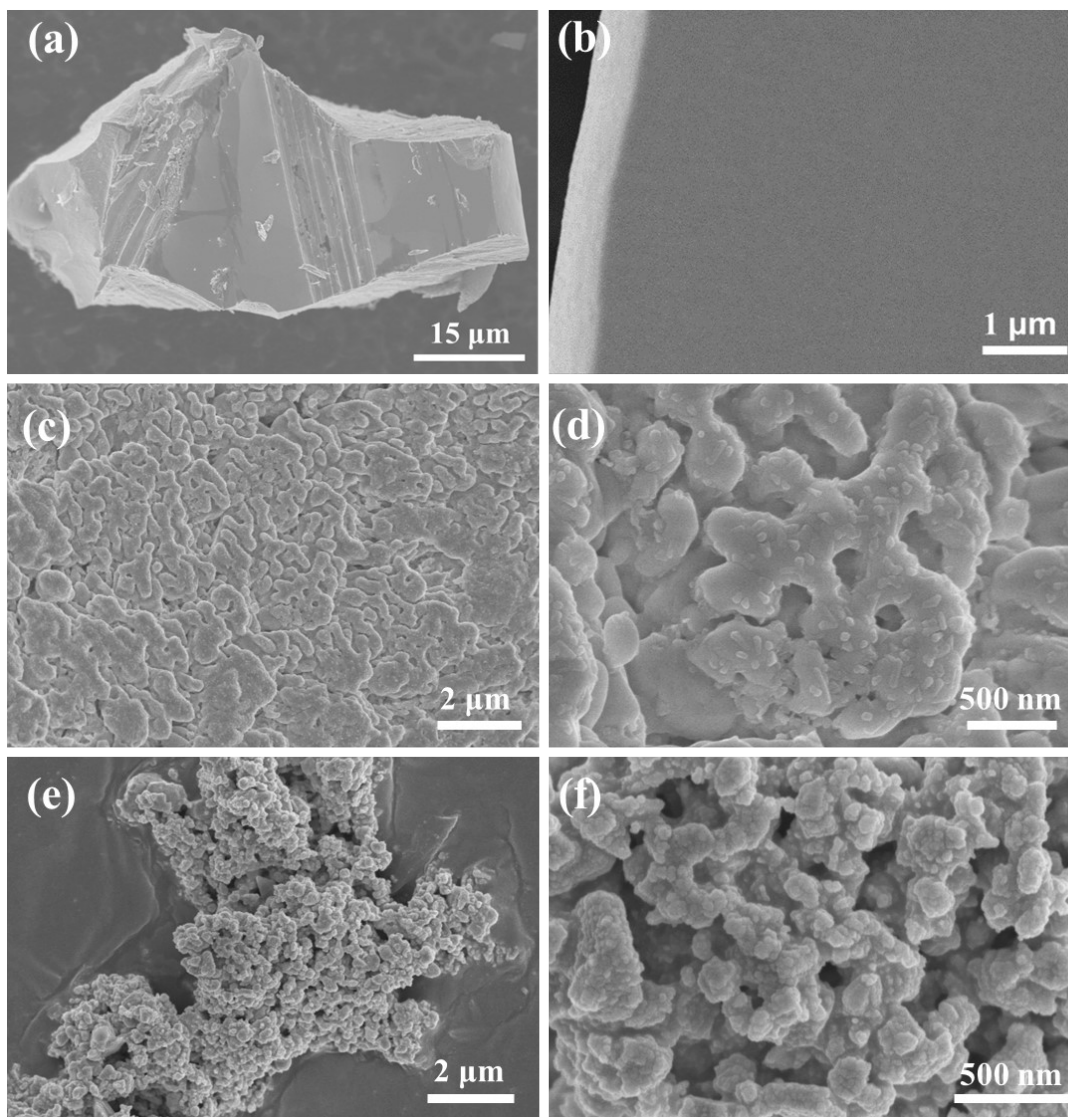

Fig. S4. SEM images of PbO<sub>2</sub>/CP (a, b), Bi-PbCl<sub>2</sub>/CP (c, d), and Bi/CP (e-f)

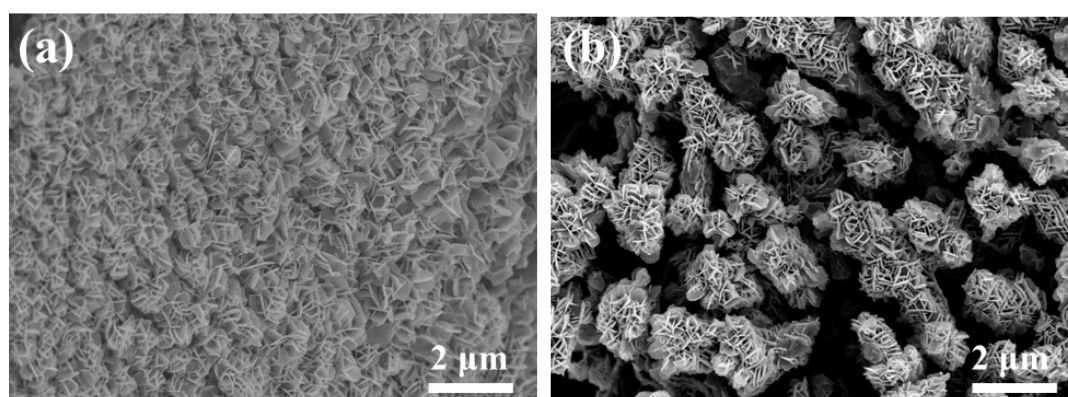

Fig. S5. SEM images of PbO<sub>2</sub>/CP (a) and Bi-PbCl<sub>2</sub>/CP (b) after electroreduction

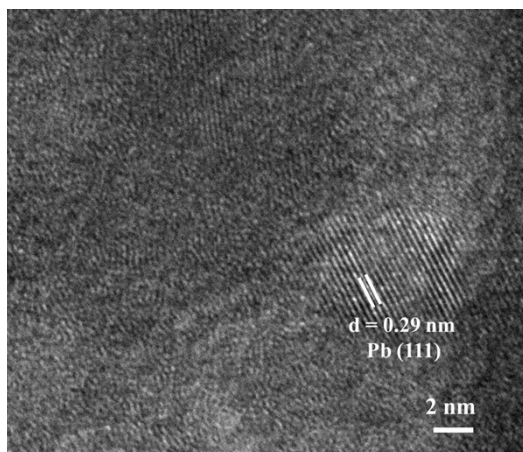

Fig. S6. TEM image of  $\text{PbO}_2/\text{CP}$  after electroreduction

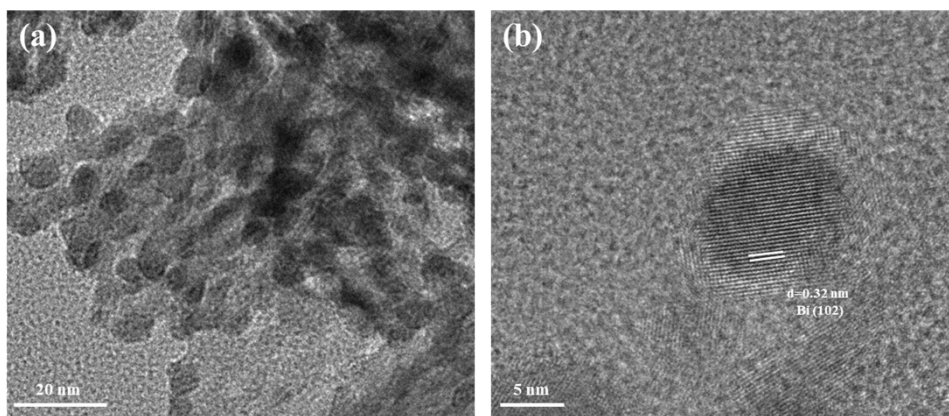

Fig. S7. TEM images of  $\text{Bi}/\text{CP}$  catalyst

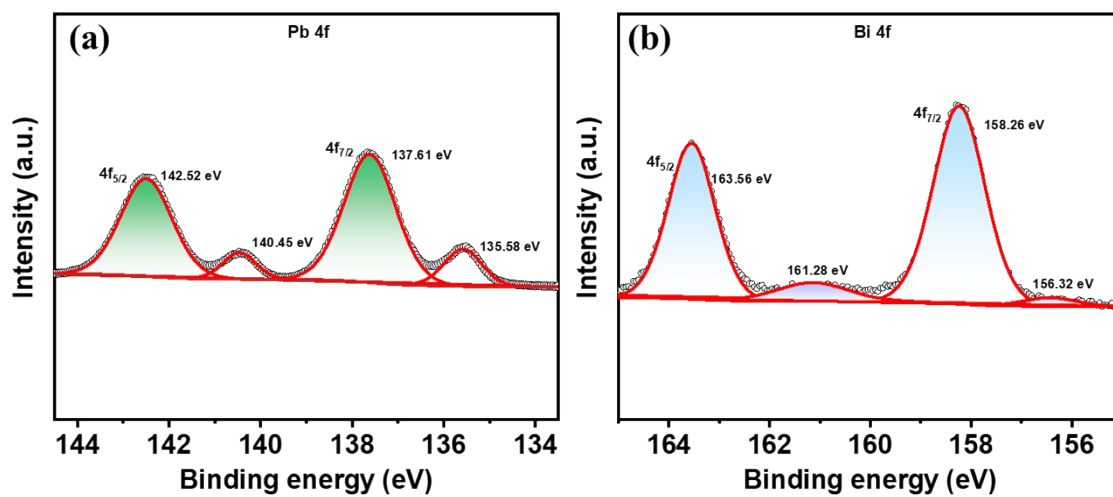

Fig. S8.  $\text{Pb}$  4f spectra of  $\text{PbO}_2/\text{CP}$  (a) after electroreduction and  $\text{Bi}$  4f spectra of  $\text{Bi}/\text{CP}$  (b)

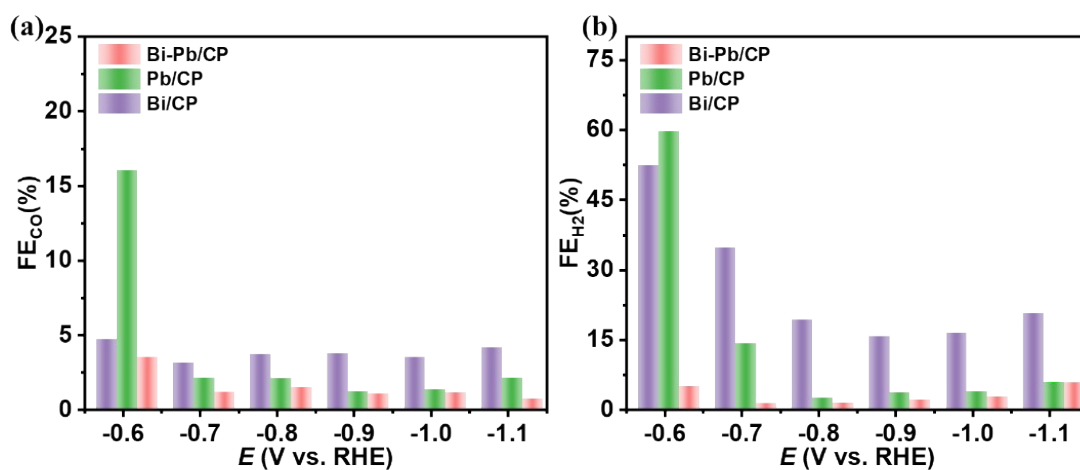

Fig. S9. The FE of CO (a) and H<sub>2</sub> (b) at various applied potentials for Pb/CP, Bi/CP, and Bi-Pb/CP in 0.5 M KHCO<sub>3</sub> solution

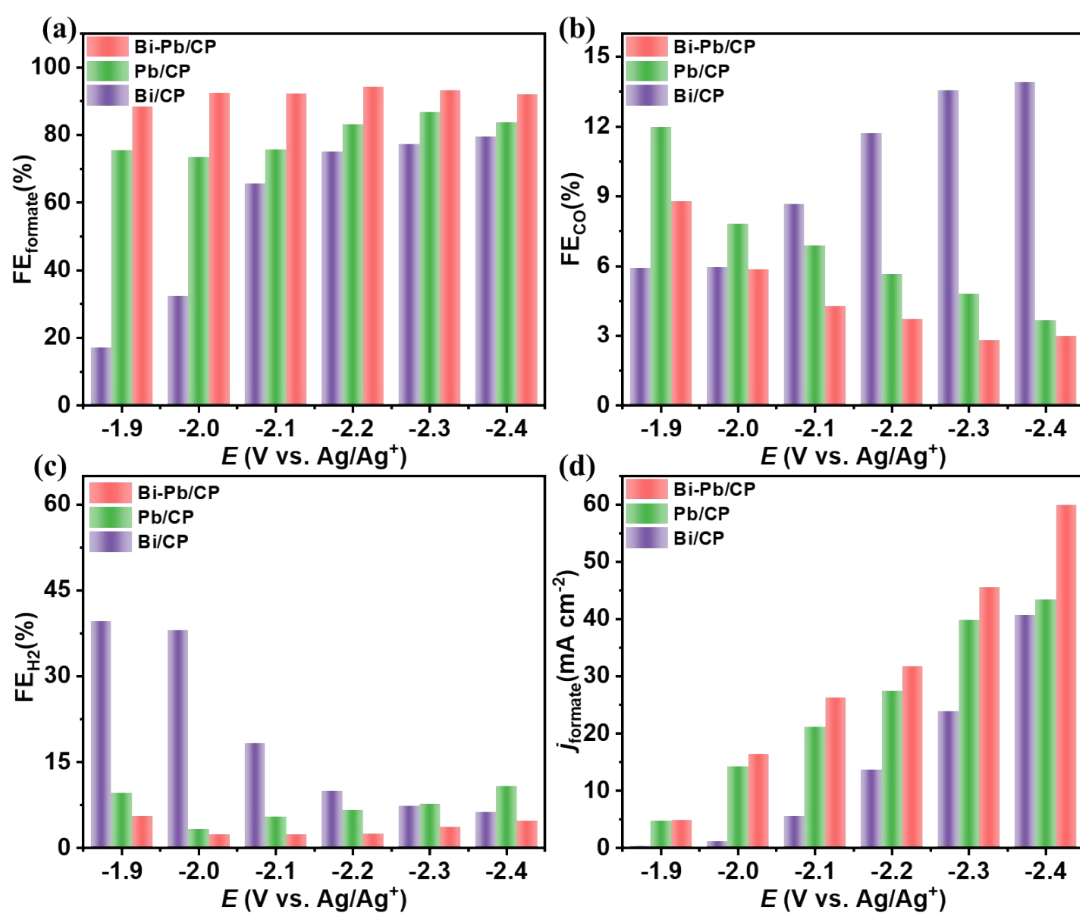

Fig. S10 The FE of formate (a), CO (b) and H<sub>2</sub> (c) at various applied potentials for Pb/CP, Bi/CP, and Bi-Pb/CP in 30 wt% [Bmim][BF<sub>4</sub>]/AcN-H<sub>2</sub>O (5 wt%) IL electrolyte



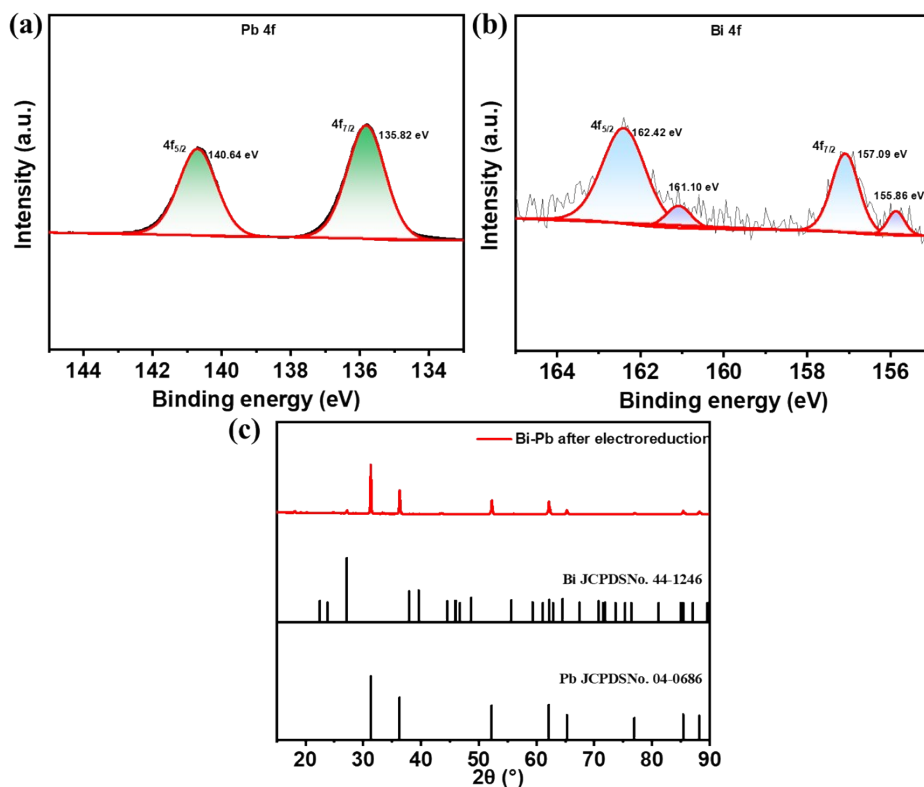

Fig. S11. XPS spectra of Pb 4f (a) and Bi 4f (b) and XRD pattern (c) of Bi-Pb/CP after 10 h electrolysis

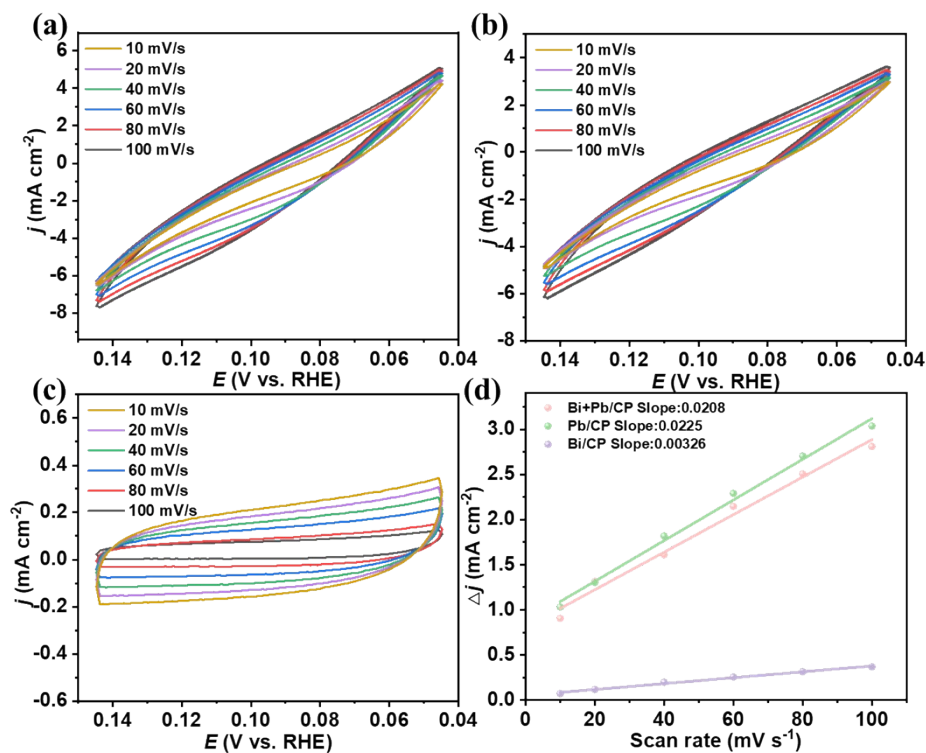

Fig. S12. Cyclic voltammograms at the range of -0.55 to -0.65 V with different scan rates (10, 20, 40, 60, 80, 100 mV s $^{-1}$ ) for Pb/CP (a), Bi-Pb/CP (b) and Bi/CP (c); Charging current density differences plotted against scan rate (d)

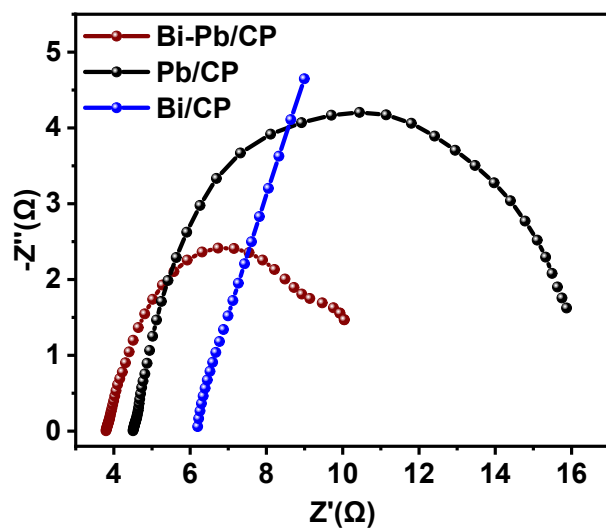

Fig. S13. Nyquist plots for Pb/CP, Bi/CP and Bi-Pb/CP

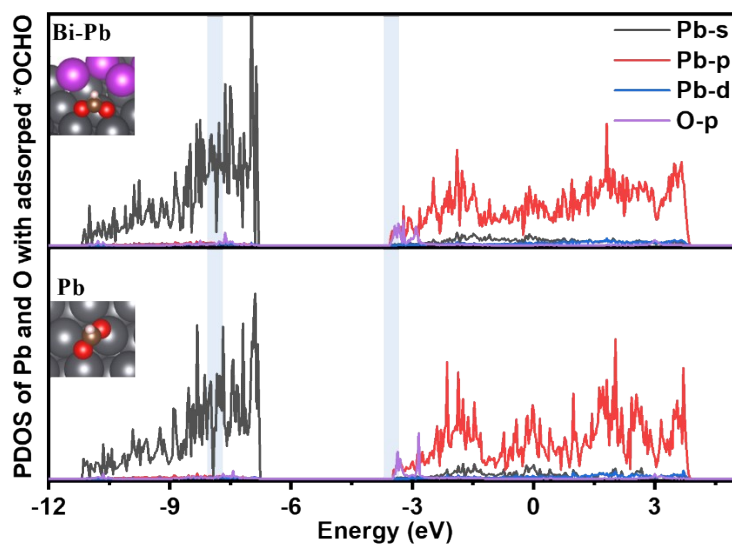

Fig. S14. The DOS of Pb atom and O atom on Bi-Pb(111) and Pb(111) surfaces with adsorbed \*OCHO

Table S1. Current density and FE of formate in CO<sub>2</sub> electrochemical reduction using various electrodes and catholytes in H-type cell

| Catalysts                                          | Electrolyte              | Potential (V)   | FE <sub>formate</sub> (%) | $j_{\text{formate}}$ (mA cm <sup>-2</sup> ) | Formate formation rate (μmol h <sup>-1</sup> cm <sup>-2</sup> ) | Ref. |
|----------------------------------------------------|--------------------------|-----------------|---------------------------|---------------------------------------------|-----------------------------------------------------------------|------|
| Bi flake                                           | 0.1 M KHCO <sub>3</sub>  | -0.6 vs RHE     | 99                        | 4                                           | 74.6                                                            | 1    |
| S-Bi <sub>2</sub> O <sub>3</sub> -CNT              | 0.5 M KHCO <sub>3</sub>  | -1.1 vs RHE     | 90                        | 45                                          | 839.4                                                           | 2    |
| Bi-MOF                                             | 0.1 M KHCO <sub>3</sub>  | -0.9 vs RHE     | 92                        | 4                                           | 74.6                                                            | 3    |
| Bi nanosheet with vacancies                        | 0.1 M KHCO <sub>3</sub>  | -0.8 vs RHE     | 97                        | 3.8                                         | 70.9                                                            | 4    |
| Bi nanotubes                                       | 0.5 M NaHCO <sub>3</sub> | -1.0 vs RHE     | 97                        | 25                                          | 466.3                                                           | 5    |
| Bi nanosheet                                       | 0.5 M KHCO <sub>3</sub>  | -0.8 vs RHE     | 93                        | 30                                          | 599.6                                                           | 6    |
| Bi nanodendrites                                   | 0.5 M NaHCO <sub>3</sub> | -1.8 vs SCE     | 96.4                      | 15.2                                        | 283.5                                                           | 7    |
| S-Bi/Ag                                            | 0.5 M NaHCO <sub>3</sub> | -1.0 vs. RHE    | 94.7                      | 28.1                                        | 561.6                                                           | 8    |
| Bi <sub>2</sub> O <sub>3</sub> -NGQDs              | 0.5 M KHCO <sub>3</sub>  | -0.87 vs RHE    | 98                        | 16.6                                        | 309.6                                                           | 9    |
| Helical Bi <sub>2</sub> O <sub>3</sub> microfibers | 0.1 M KHCO <sub>3</sub>  | -1.2 vs RHE     | 90                        | 13                                          | 242.4                                                           | 10   |
| Eutectic Bi-Sn                                     | 0.1 M KHCO <sub>3</sub>  | -1.1 vs RHE     | 78                        | 10.7                                        | 199.6                                                           | 11   |
| Bi@Bi <sub>2</sub> O <sub>2</sub> CO <sub>3</sub>  | 0.5 M KHCO <sub>3</sub>  | -0.8 vs RHE     | 97                        | 38                                          | 708.8                                                           | 12   |
| Nafion/Bi NSs@Cu foam                              | 0.5 M KHCO <sub>3</sub>  | -0.97 vs RHE    | 97.3                      | 36                                          | 671.5                                                           | 13   |
| Pd-Bi nanosheet                                    | 0.5 M KHCO <sub>3</sub>  | -1.0 vs RHE     | 91.9                      | 25                                          | 466.3                                                           | 14   |
| CuBi                                               | 0.5 M KHCO <sub>3</sub>  | -1.2 vs RHE     | 90.8                      | 33                                          | 615.5                                                           | 15   |
| Pb QDDCs                                           | 0.5 M KHCO <sub>3</sub>  | -0.2 vs RHE     | 95                        | 16                                          | 298.4                                                           | 16   |
| Pb NP/MWCNT                                        | 0.5 M KHCO <sub>3</sub>  | -1.8 vs Ag/AgCl | 70                        | 30                                          | 559.6                                                           | 17   |
| Sulfide-derived Pb                                 | 0.1 M KHCO <sub>3</sub>  | -1.08 vs RHE    | 88                        | 12                                          | 223.8                                                           | 18   |
| Bi@np-Cu                                           | 0.5 M KHCO <sub>3</sub>  | -0.97 vs RHE    | 97.7                      | 82                                          | 1529.5                                                          | 19   |

|                                                                                                   |                                        |                    |       |       |       |              |
|---------------------------------------------------------------------------------------------------|----------------------------------------|--------------------|-------|-------|-------|--------------|
| Ag-loaded Bi <sub>2</sub> O <sub>2</sub> CO <sub>3</sub>                                          | 0.5 M<br>KHCO <sub>3</sub>             | -1.1 vs<br>RHE     | 95.8  | 15.3  | 285.4 | 20           |
| Bi <sub>2</sub> O <sub>2</sub> CO <sub>2</sub> modified with<br>iodine and pyrenyl-<br>graphdiyne | 0.5 M<br>KSO <sub>4</sub><br>(pH: 3.5) | -1.4 vs<br>RHE     | 94.84 | ~60   | -     | 21           |
| CuBi <sub>3</sub>                                                                                 | 0.1 M<br>KHCO <sub>3</sub>             | -1.3 vs<br>RHE     | 98.3  | 21.2  | 396.1 | 22           |
| Ce leaching-derived Bi<br>nanosheets                                                              | 0.5 M<br>KHCO <sub>3</sub>             | -1.4 vs<br>RHE     | 95    | 46.4  | 865.5 | 23           |
| Bi-MOFs                                                                                           | 0.1 M<br>KHCO <sub>3</sub>             | -1.1 vs<br>RHE     | 90.4  | 20.8  | -     | 24           |
| 3D bi-continuous<br>nanoporous bismuth                                                            | 0.1 M<br>KHCO <sub>3</sub>             | -0.956 vs<br>RHE   | 92.6  | 5     | 93.2  | 26           |
| dendritic Bi film                                                                                 | 0.1 M<br>KHCO <sub>3</sub>             | -0.90 vs<br>RHE    | ~80   | 8.6   | 160.4 | 27           |
| 2D Bi <sub>2</sub> S <sub>3</sub> NSs                                                             | 0.5 M<br>KHCO <sub>3</sub>             | -0.93 vs<br>RHE    | ~95   | ~30   | 559.6 | 28           |
| Sb <sub>2.5</sub> /Bi@C                                                                           | 0.5 M<br>KHCO <sub>3</sub>             | -1.4 vs<br>Ag/AgCl | 94.8  | ~5    | 93.3  | 29           |
| 5% Bi-InOCl                                                                                       | 0.5 M<br>NaHCO <sub>3</sub>            | -0.9 vs<br>RHE     | 89.9  | 14.89 | 277.7 | 30           |
| Bi <sub>2</sub> O <sub>2</sub> CO <sub>3</sub> ultrathin<br>nanosheets                            | 0.5 M<br>NaHCO <sub>3</sub>            | -0.9 vs<br>RHE     | 96    | 25    | 466.3 | 31           |
| Cu-doped Bi catalyst                                                                              | 0.1 M<br>KHCO <sub>3</sub>             | -1.1 vs<br>RHE     | 94    | 20    | 373.3 | 32           |
| Bi-Cr <sub>2</sub> O <sub>3</sub> nano-dendrites                                                  | 1.0 M<br>KHCO <sub>3</sub>             | -1.1 vs<br>RHE     | 93.3  | 40.7  | 759.2 | 33           |
| Bi-Pb                                                                                             | 0.5 M<br>KHCO <sub>3</sub>             | -1.1 vs<br>RHE     | 93.0  | 53.1  | 990.5 | This<br>work |

## Reference

- 1 S. Kim, W. J. Dong, S. Gim, W. Sohn, J. Y. Park, C. J. Yoo, H. W. Jang and J.-L. Lee, *Nano Energy*, 2017, **39**, 44-52.
- 2 S.-Q. Liu, M.-R. Gao, R.-F. Feng, L. Gong, H. Zeng and J.-L. Luo, *ACS Catal.*, 2021, **11**, 7604-7612.
- 3 F. Li, G. H. Gu, C. Choi, P. Kolla, S. Hong, T.-S. Wu, Y.-L. Soo, J. Masa, S. Mukerjee, Y. Jung, J. Qiu and Z. Sun, *Appl. Catal. B*, 2020, **277**, 119241.
- 4 M. Zhao, Y. Gu, W. Gao, P. Cui, H. Tang, X. Wei, H. Zhu, G. Li, S. Yan, X. Zhang and Z. Zou, *Appl. Catal. B*, 2020, **266**.
- 5 K. Fan, Y. Jia, Y. Ji, P. Kuang, B. Zhu, X. Liu and J. Yu, *ACS Catal.*, 2019, **10**, 358-364.
- 6 J. Fan, X. Zhao, X. Mao, J. Xu, N. Han, H. Yang, B. Pan, Y. Li, L. Wang and Y. Li, *Adv. Mater.*, 2021, **33**.
- 7 H. Zhong, Y. Qiu, T. Zhang, X. Li, H. Zhang and X. Chen, *J. Mater. Chem. A*, 2016, **4**, 13746-13753.
- 8 J. Liu, Y. Li, Y. Wang, C. Xiao, M. Liu, X. Zhou, H. Jiang and C. Li, *Nano Research*, 2021, **15**, 1409-1414.

- 9 Z. Chen, K. Mou, X. Wang and L. Liu, *Angew. Chem. Int. Ed.*, 2018, **57**, 12790-12794.
- 10 H. Ning, Y. Wang, X. Fei, X. Wang, X. Jin, Y. Zou, C. Ma, Z. Jiao, Y. Zhao and M. Wu, *ChemSusChem*, 2023, **16**, e202201810.
- 11 J. Tang, R. Daiyan, M. B. Ghasemian, S. A. Idrus-Saidi, A. Zavabeti, T. Daeneke, J. Yang, P. Koshy, S. Cheong, R. D. Tilley, R. B. Kaner, R. Amal and K. Kalantar-Zadeh, *Nat. Commun.*, 2019, **10**, 4645.
- 12 X.-D. Liang, Q.-Z. Zheng, N. Wei, Y.-Y. Lou, S.-N. Hu, K.-M. Zhao, H.-G. Liao, N. Tian, Z.-Y. Zhou and S.-G. Sun, *Nano Energy*, 2023, **114**.
- 13 S. Chang, Y. Xuan, J. Duan and K. Zhang, *Appl. Catal. B*, 2022, **306**.
- 14 L. Xie, X. Liu, F. Huang, J. Liang, J. Liu, T. Wang, L. Yang, R. Cao and Q. Li, *Chinese J. Catal.*, 2022, **43**, 1680-1686.
- 15 M. Y. Zu, L. Zhang, C. Wang, L. R. Zheng and H. G. Yang, *J. Mater. Chem. A*, 2018, **6**, 16804-16809.
- 16 M. Liu, M. Liu, X. Wang, S. M. Kozlov, Z. Cao, P. De Luna, H. Li, X. Qiu, K. Liu, J. Hu, C. Jia, P. Wang, H. Zhou, J. He, M. Zhong, X. Lan, Y. Zhou, Z. Wang, J. Li, A. Seifitokaldani, C. T. Dinh, H. Liang, C. Zou, D. Zhang, Y. Yang, T.-S. Chan, Y. Han, L. Cavallo, T.-K. Sham, B.-J. Hwang and E. H. Sargent, *Joule*, 2019, **3**, 1703-1718.
- 17 Y. Xing, M. Cui, P. Fan, J. Ren, C. Zhang, N. Li, X. Wen and X. Ji, *Mater. Chem. Phys.*, 2019, **237**, 121826.
- 18 J. E. Pander, J. W. J. Lum and B. S. Yeo, *J. Mater. Chem. A*, 2019, **7**, 4093-4101.
- 19 Q. Zhao, J. Wang, Y. Zhuang, L. Gong, W. Zhang, W. Fan, Z. Lu, Y. Zhang, T. Fujita, P. Zhang and Q. Xue, *Sci. China Mater.*, 2024, **67**, 796-803.
- 20 W. Zheng, C. Wang, J. Chen, S. Chen, Z. Lin, M. Huang, H. Huang, Y. Qu, P. Wang, L. Hu and Q. Chen, *Dalton Trans.*, 2024, **53**, 4617-4623.
- 21 M. Zhang, J. Wang, X. Rong, X.-L. Lu and T.-B. Lu, *Nano Research*, 2023, **17**, 2381-2387.
- 22 Y. Fu, K. Leng, H. Zhuo, W. Liu, L. Liu, G. Zhou and J. Tang, *J. CO<sub>2</sub> Util.*, 2023, **70**, 102456.
- 23 J. Zhu, Y. Tong, H. B. Xu, X. Ren, X. Peng and P. Chen, *Acs Sustain. Chem. Eng.*, 2023, **12**, 938-946.
- 24 L. Li, X. Kang, M. He, A. Sheveleva, K. Hu, S. Xu, Y. Zhou, J. Chen, S. Sapchenko, G. Whitehead, I. J. Vitorica-Yrezabal, L. Lopez-Odrizola, L. S. Natrajan, E. J. L. McInnes, M. Schröder, S. Yang and F. Tuna, *J. Mater. Chem. A*, 2022, **10**, 17801-17807.
- 25 C. Lin, Y. Liu, X. Kong, Z. Geng and J. Zeng, *Nano Research*, 2022, **15**, 10078-10083.
- 26 W. Lai, Y. Liu, M. Zeng, D. Han, M. Xiao, S. Wang, S. Ren and Y. Meng, *Nanomaterials*, 2023, **13**, 1767.
- 27 F. Lhostis, N. H. Tran, G. Rousse, S. Zanna, N. Menguy and M. Fontecave, *ChemElectroChem*, 2024, DOI: 10.1002/celec.202300799, e202300799.
- 28 Y. Li, J. Chen, S. Chen, T. Lu, X. Liao, T. Zhao, F. Cheng and H. Wang, *Appl. Catal. B*, 2024, **349**, 123874.
- 29 S. Ma, K. Wu, S. Fan, Y. Li, Q. Xie, J. Ma and L. Yang, *Sep. Purif. Technol.*, 2024, **339**, 126520.
- 30 Y. Jia, H. Yang, R. Chen, Y. Zhang, F. Gao, C. Nan, J. Yang and X. Gao, *J. Alloys Compd.*, 2024, **987**, 174220.
- 31 Q. Huang, X. Sha, R. Yang, H. Li and J. Peng, *ACS Appl. Mater. Inter.*, 2024, **16**, 13882-13892.
- 32 Y. Wei, X. Xu, D. Shi, Y. Jiang, C. Zheng, L. Tan, Z. Liu, S. Zhong and Y. Yu, *Small*, 2024, DOI: 10.1002/sml.202401017, e2401017.

33 F. Kong, C. Wen, L. Kang, P. Gao, L. Dong, B. Li, H. He, M. Fan and Z. Chen, *Molecular Catalysis*, 2024, **559**, 114118.
